# Supplementary material for: Development of a preoperative index-based nomogram for the prediction of hypokalemia in patients with pituitary adenoma: a retrospective cohort study
Source: PeerJ. 2021 Jul 19;9:e11650. doi: 10.7717/peerj.11650 (PMC8297473; doi:10.7717/peerj.11650)
Supplement: Supplemental Information 2 [file peerj-09-11650-s002.xlsx]

## Sheet: Sheet1
num
ag
sex	1=male	2=female
education
education2	1=Junior high school or below	2=High school or above
marriage	1=married	2=unmarried
smoking	1=yes	2=no
drinking	1=yes	2=no
SBP
DBP
hypertension	0=no	1=yes
history hypertension	1=yes	2=no
heart rate
diabtes	0=no	1=yes
type of pituitary	1=nonfunctioning pituitary	2=ACTH pituitary	3=PRL pituitary	4=GH pituitary	5=other function pituitary
type of pituitary2	nonfunction pituitary	2=function pituitary
Preoperative medication	1=yes	2=no
Preoperative surgical treatment	1=yes	2=no
Preoperative radiotherapy	1=yes	2=no
Maximum tumor diameter
Weight
height
BMI
pt
pta
ptr
ptnir
fbg
aptt
tt
dd
alt
ast
Total bilirubin
Direct bilirubin
Indirect bilirubin
ggt
alp
k
na
cl
ga
p
mg
cysc
Urea
Creatinine
carbon dioxide
ua
glu
Hydroxybutyric acid
chol
tg
hdlc
ldlc
Apolipoprotein a
Apolipoprotein b
pa
tp
ALB
glb
Albumin globulin
tba
ck
ldh
ckmb
c-reactive protein
ceh
afu
lip
samy
Fe
uibc
tibc
tf
ada
sod
nefa
wbc
rbc
hgb
plt
hct
mcv
mch
mchc
rdwcv
rdwsd
lym
neut
mono
eos
baso
lyw
neutnum
mononum
eosnum
basonum
pct
mpv
pdw
plcr
ret
retnum
irf
Postoperative hypokalemia	0=no	1=yes
